# Supplementary material for: Conformational dynamics of SARS-CoV-2 trimeric spike glycoprotein in complex with receptor ACE2 revealed by cryo-EM
Source: PubMed Central journal article supplement — Sci Adv. 2021 Jan 1;7(1):eabe5575. doi: 10.1126/sciadv.abe5575 (PMC7775788; doi:10.1126/sciadv.abe5575), 2021-01-01
Supplement: abe5575_SM.pdf [file abe5575_SM.pdf]

## Supplementary Materials for

### **Conformational dynamics of SARS-CoV-2 trimeric spike glycoprotein in complex with receptor ACE2 revealed by cryo-EM**

Cong Xu, Yanxing Wang, Caixuan Liu, Chao Zhang, Wenyu Han, Xiaoyu Hong, Yifan Wang, Qin Hong, Shutian Wang, Qiaoyu Zhao, Yalei Wang, Yong Yang, Kaijian Chen, Wei Zheng, Liangliang Kong, Fangfang Wang, Qinyu Zuo, Zhong Huang\*, Yao Cong\*

\*Corresponding author. Email: [cong@sibcb.ac.cn](mailto:cong@sibcb.ac.cn) (Y.C) and [huangzhong@ips.ac.cn](mailto:huangzhong@ips.ac.cn) (Z.H.)

Published 4 December 2020, *Sci. Adv.* **6**, eabe5575 (2020)

DOI: 10.1126/sciadv.abe5575

#### **This PDF file includes:**

Figs. S1 to S7  
Tables S1 to S3

#### **Other Supplementary Material for this manuscript includes the following:**

(available at [advances.sciencemag.org/cgi/content/full/sciadv.abe5575/DC1](https://advances.sciencemag.org/cgi/content/full/sciadv.abe5575/DC1))

Movie S1

# SUPPLEMENTARY MATERIALS

## Supplementary Figures and Legends

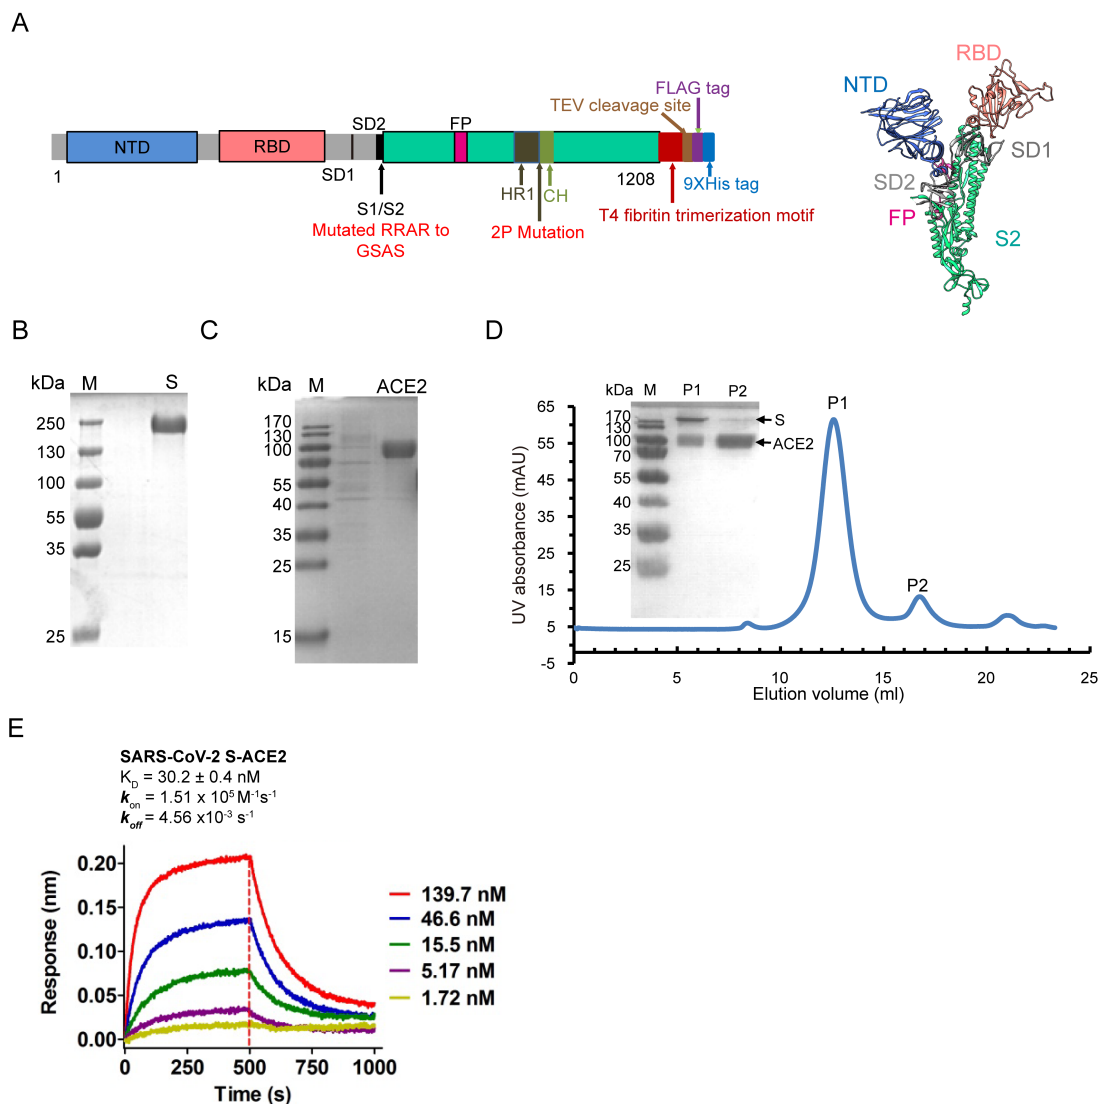

**Fig. S1. Purification of SARS-CoV-2 S ectodomain, human ACE2 PD domain, and S-ACE2 complex.** (A) Schematic diagram of SARS-CoV-2 S organization in this study. S1/S2 protease cleavage site (S1/S2), N-terminal domain (NTD), receptor-binding domain (RBD), fusion peptide (FP), heptad repeat 1 (HR1), and central helix (CH) are labeled. (B-C) SDS-PAGE analysis of the purified S protein (B) and ACE2 (C). (D) Size-exclusion chromatogram and SDS-PAGE analysis of the formed S-ACE2 complex. (E) Measurement of the binding affinity and kinetics of S trimer and ACE2 using bio-layer interferometry (BLI).

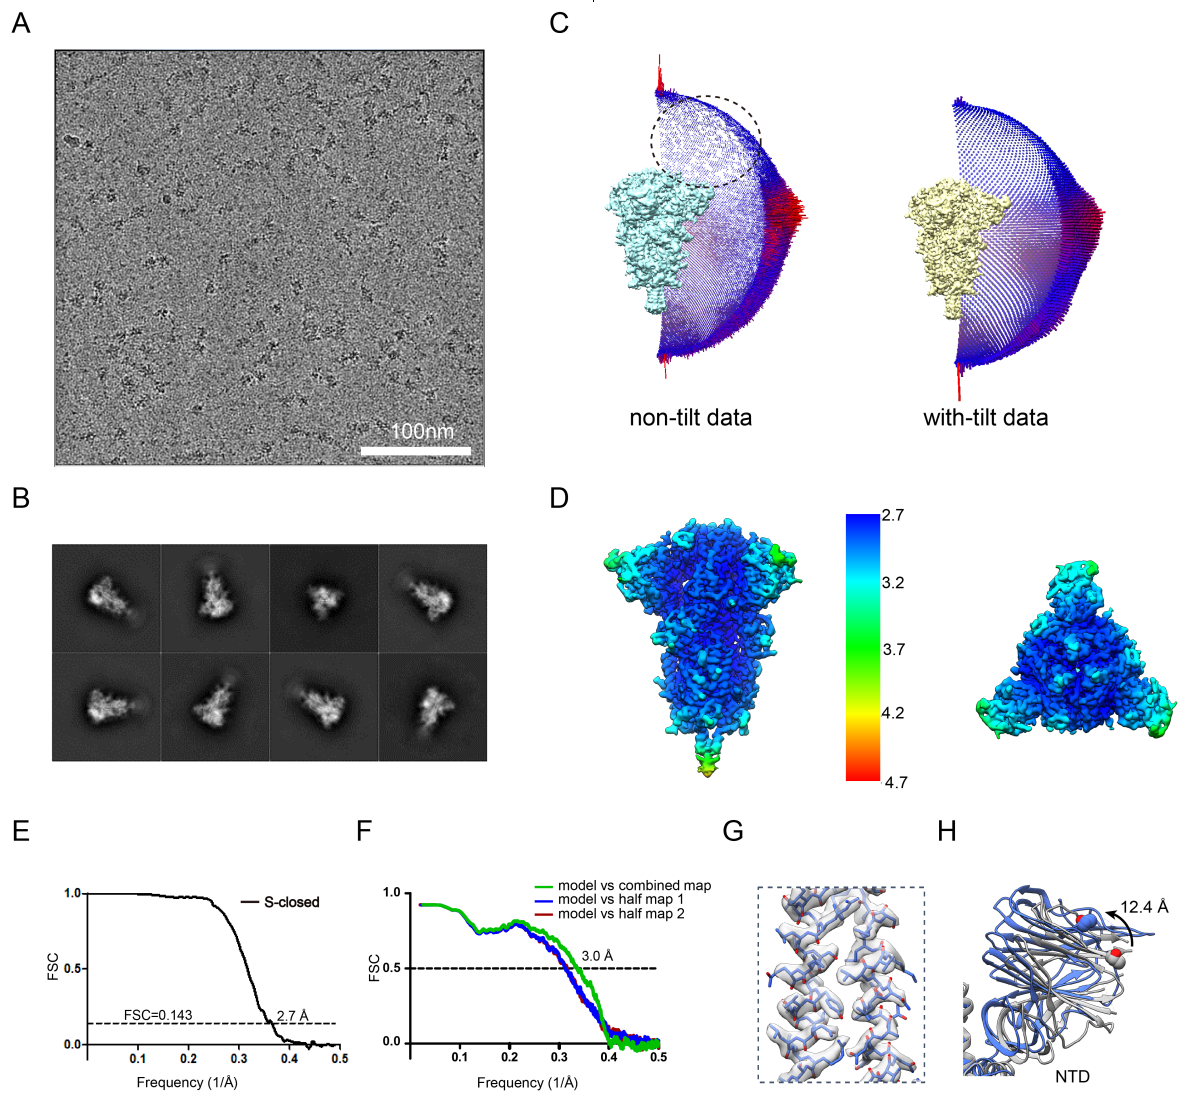

**Fig. S2. Cryo-EM analysis of the SARS-CoV-2 S trimer in the tightly closed state.** (A) Representative cryo-EM image of the SARS-CoV-2 S trimer. (B) Reference-free 2D class averages of the S trimer. (C) Euler angular distribution of 3D reconstructions before and after adding tilt data, with the dotted circle indicating the sparsely distributed tilted top views in the non-tilt data. (D-E) Local resolution evaluation (D) and resolution assessment of our S-closed cryo-EM map by Fourier shell correlation (FSC) at 0.143 criterion (E). (F) The model vs map FSC curve at 0.5 criterion for S-closed (green). FSC curves between the refined atomic model and half-map 1 that the model refined against (blue), and between the refined atomic model and half-map 2 (dark red); differences between the two curves are small, indicating the refinement of the atomic coordinates did not suffer from overfitting. (G) Close up view of the model-map fitting in S2 subunit. (H) Compared with the recent structure of SARS-CoV-2 S in closed state (gray, 6VXX), our S-closed structure (blue) showed a slight inward tilt leading the peripheral edge of NTD exhibiting a 12.4 Å inward movement (for the C $\alpha$  of T124).

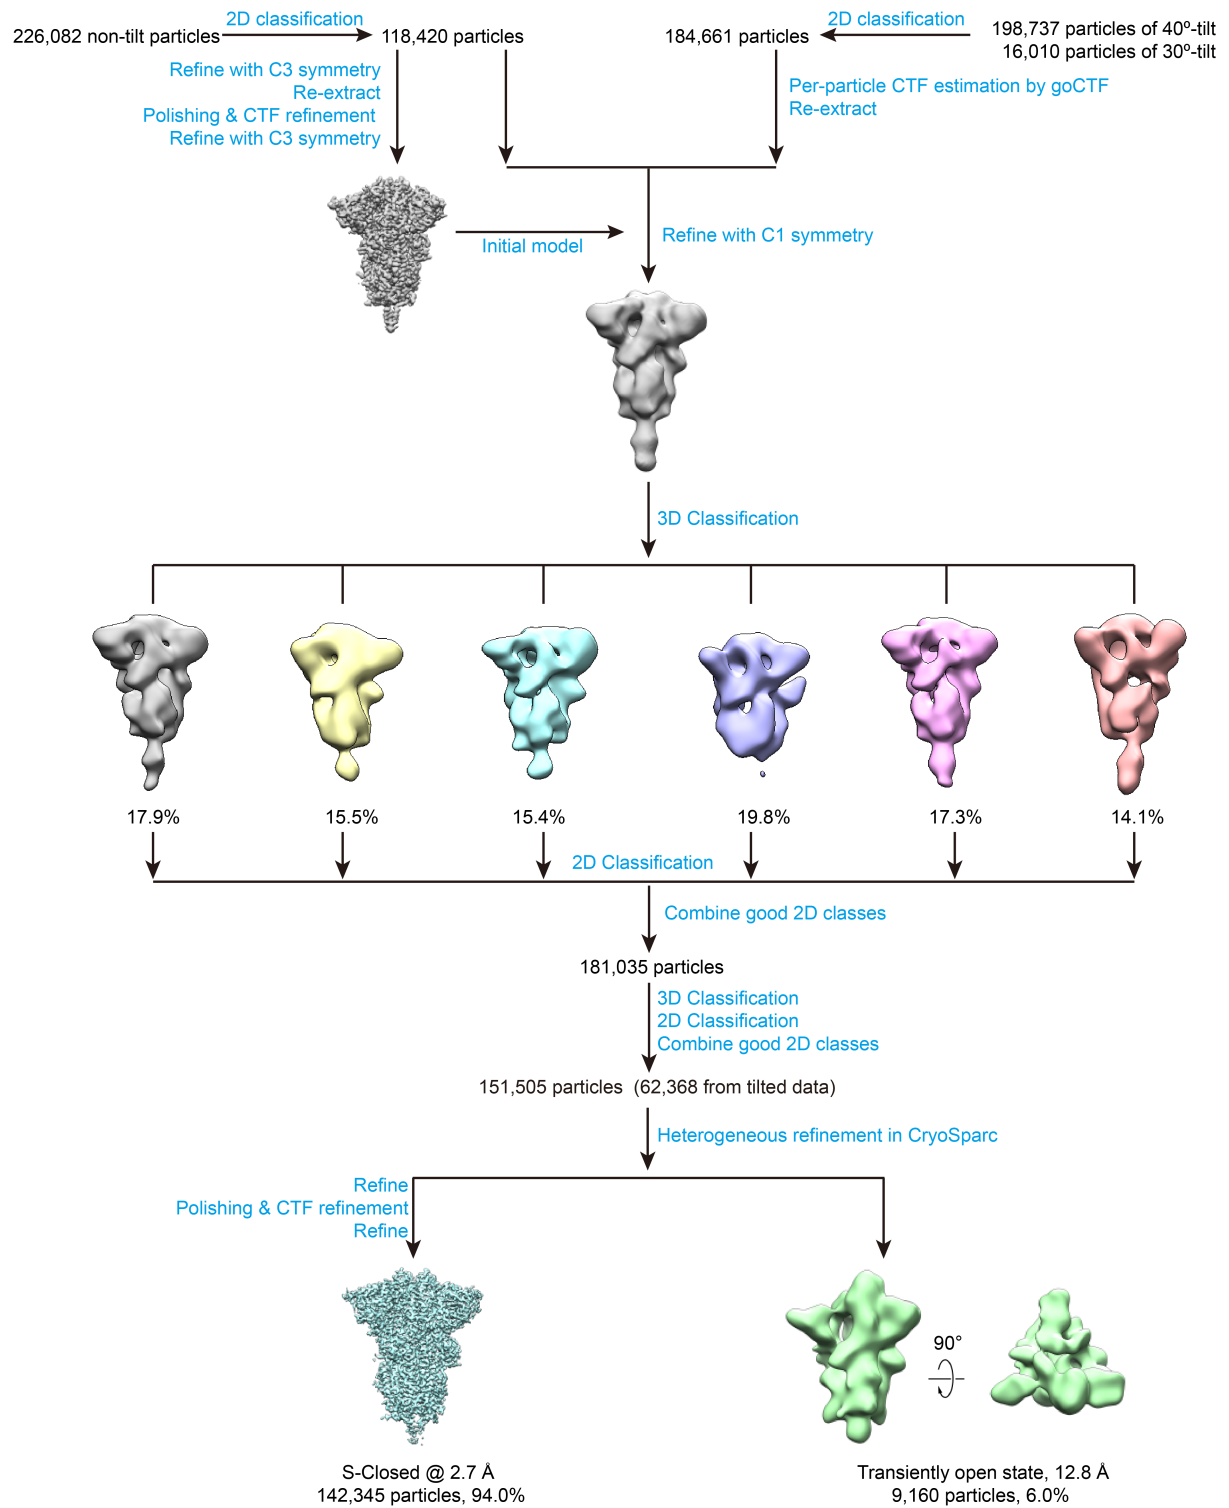

**Fig. S3. Cryo-EM data processing procedure for SARS-CoV-2 S trimer.**



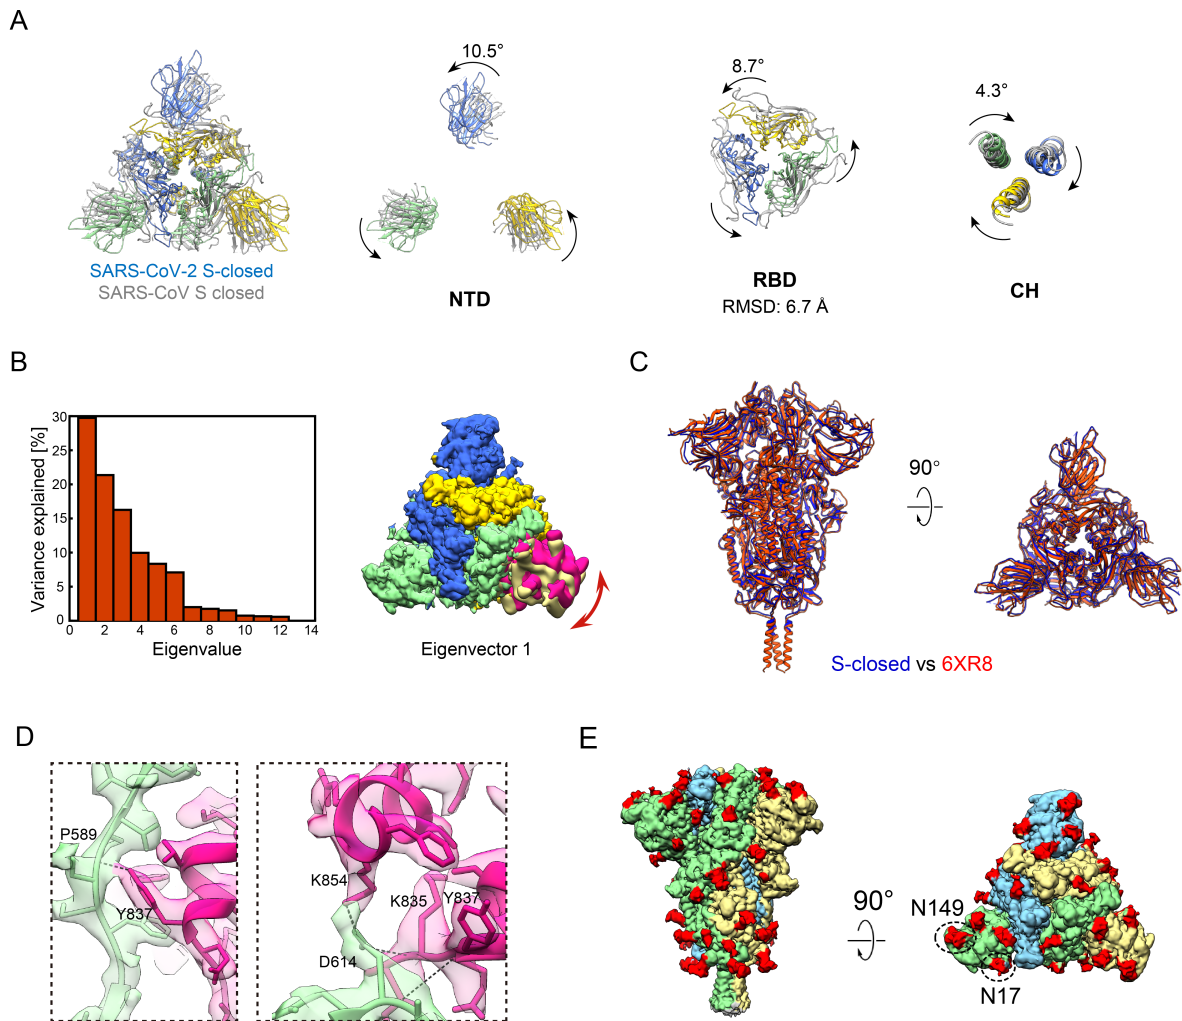

**Fig. S4. Structural analysis of the SARS-CoV-2 S-closed state.** (A) Top view of the overlaid structures between our SARS-CoV-2 S-closed and the SARS-CoV S closed structure (PDB: 5XLR) and zoom in views of the overlaid structures in NTD, RBD, CH domains. (B) Multi-body refinement and PCA analysis of the NTD region on S-closed state. Left, the contribution of all eigenvectors to the motion in the S trimer, with Eigenvector 1 contributes ~30% of the movement of the S trimer. Right, top view of the map showing the NTD in-plane swing motion (indicated by dark red arrow) of Eigenvector 1. (C) Structural comparison between our S-closed structure (blue) and the wild-type S trimer prefusion structure (PDB: 6XR8, orange). The two structures are in similar conformation. (D) Detailed density of FP and critical interactions including some salt-bridge/H-bond formed between FP and surrounding residues. FP is colored in deep pink, and SD2 from adjacent protomer in light green. (E) N-linked glycans resolved in our S-closed cryo-EM map, with the densities corresponding to glycans colored in red.

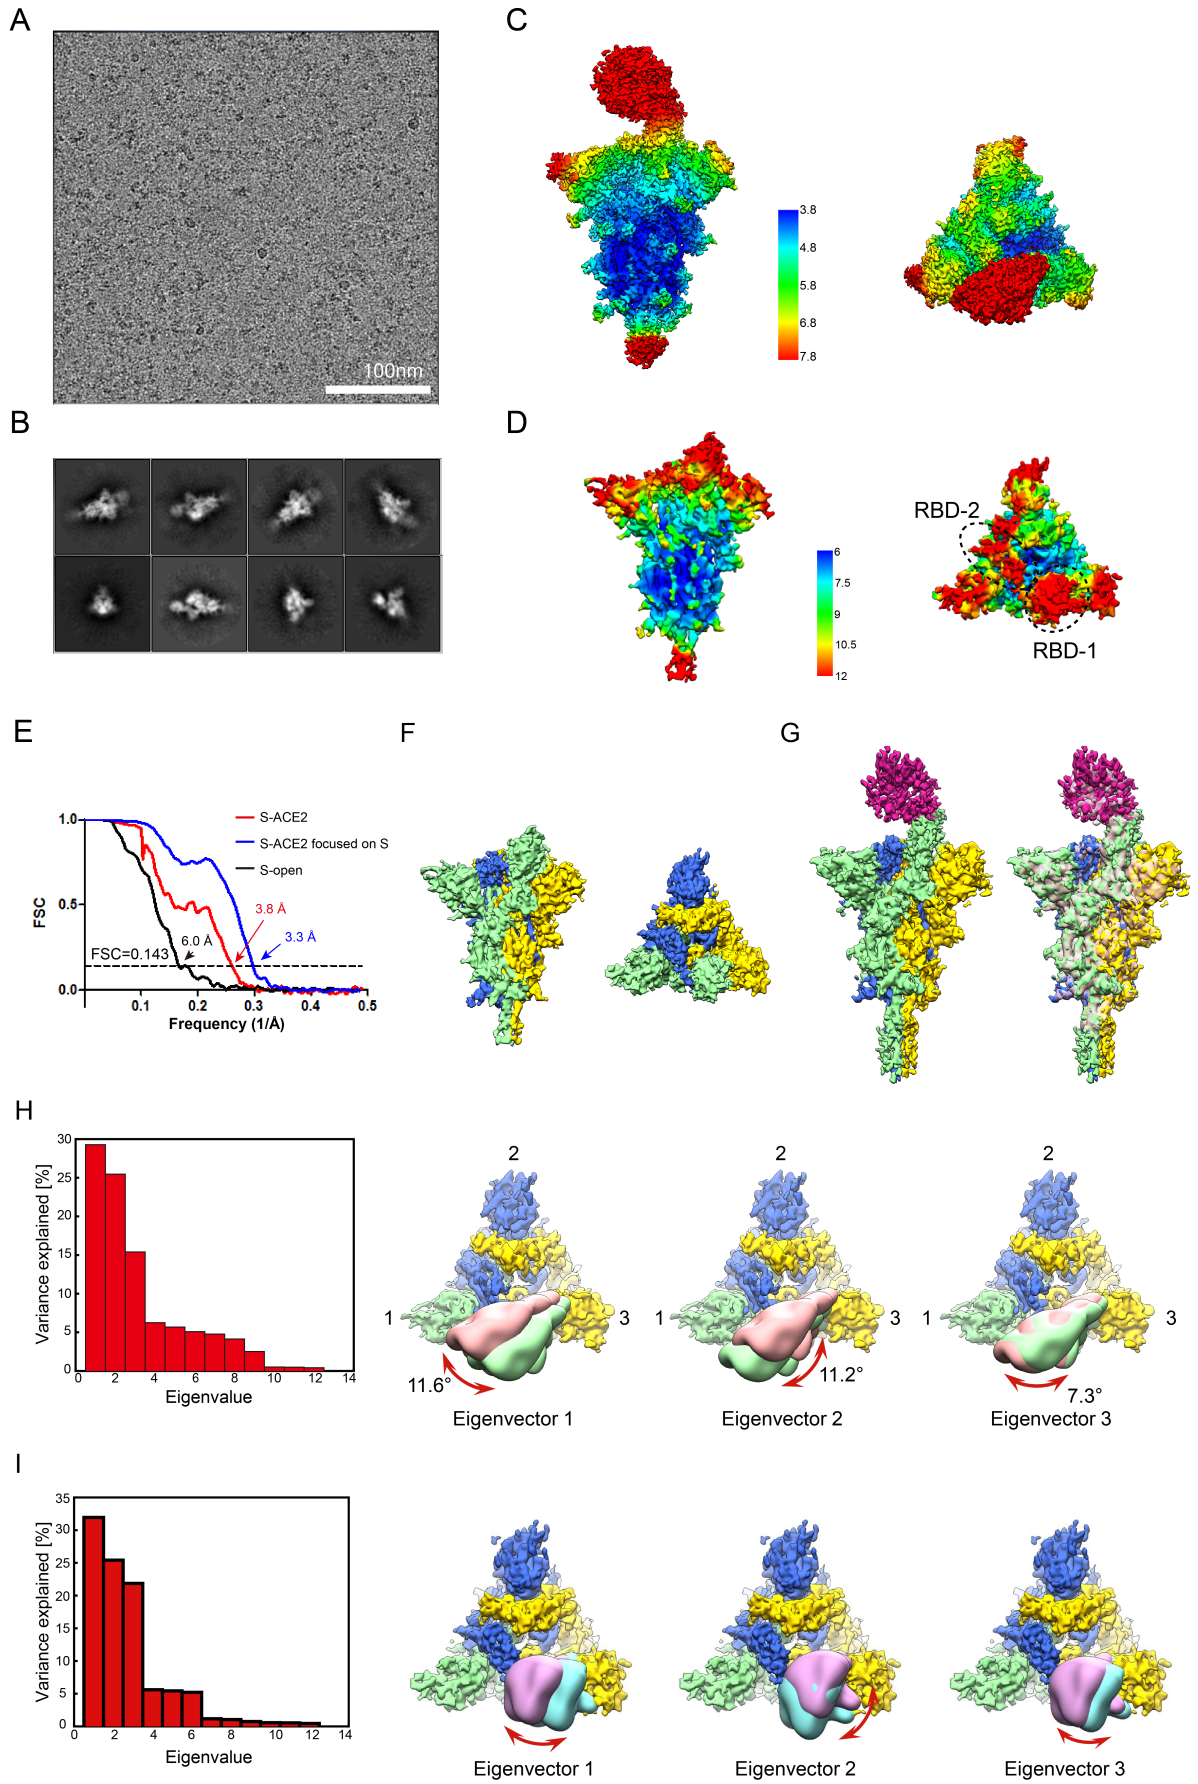

**Fig. S5. Cryo-EM analysis on the S-ACE2 complex.** (A) Representative cryo-EM image of the S trimer in the presence of ACE2. (B) Reference-free 2D class averages of the sample. (C-D) Local resolution evaluation of the S-ACE2 map (C) and S-open map (D). (E) Resolution assessment of the cryo-EM reconstructions by Fourier shell correlation (FSC) at 0.143 criterion. (F) Unliganded S-open cryo-EM map obtained from this dataset. (G) Cryo-EM map of S-ACE2 complex without cross linker (left, colored), and its overlay with S-ACE2 map with cross linker (pink, low pass filtered to similar resolution, right panel), suggesting they are in similar conformation. (H) Motions of S-ACE2 without cross linker. Left, contributions of all eigenvectors to motions of S-ACE2; right three panels, top view of the map showing the three swing motions along the first 3 eigenvectors. (I) Conformational dynamics of the up RBD in S-open state. Left, contributions of all eigenvectors to motions of S-open. Right three panels, top view of the map showing the three swing motions of the first 3 eigenvectors.

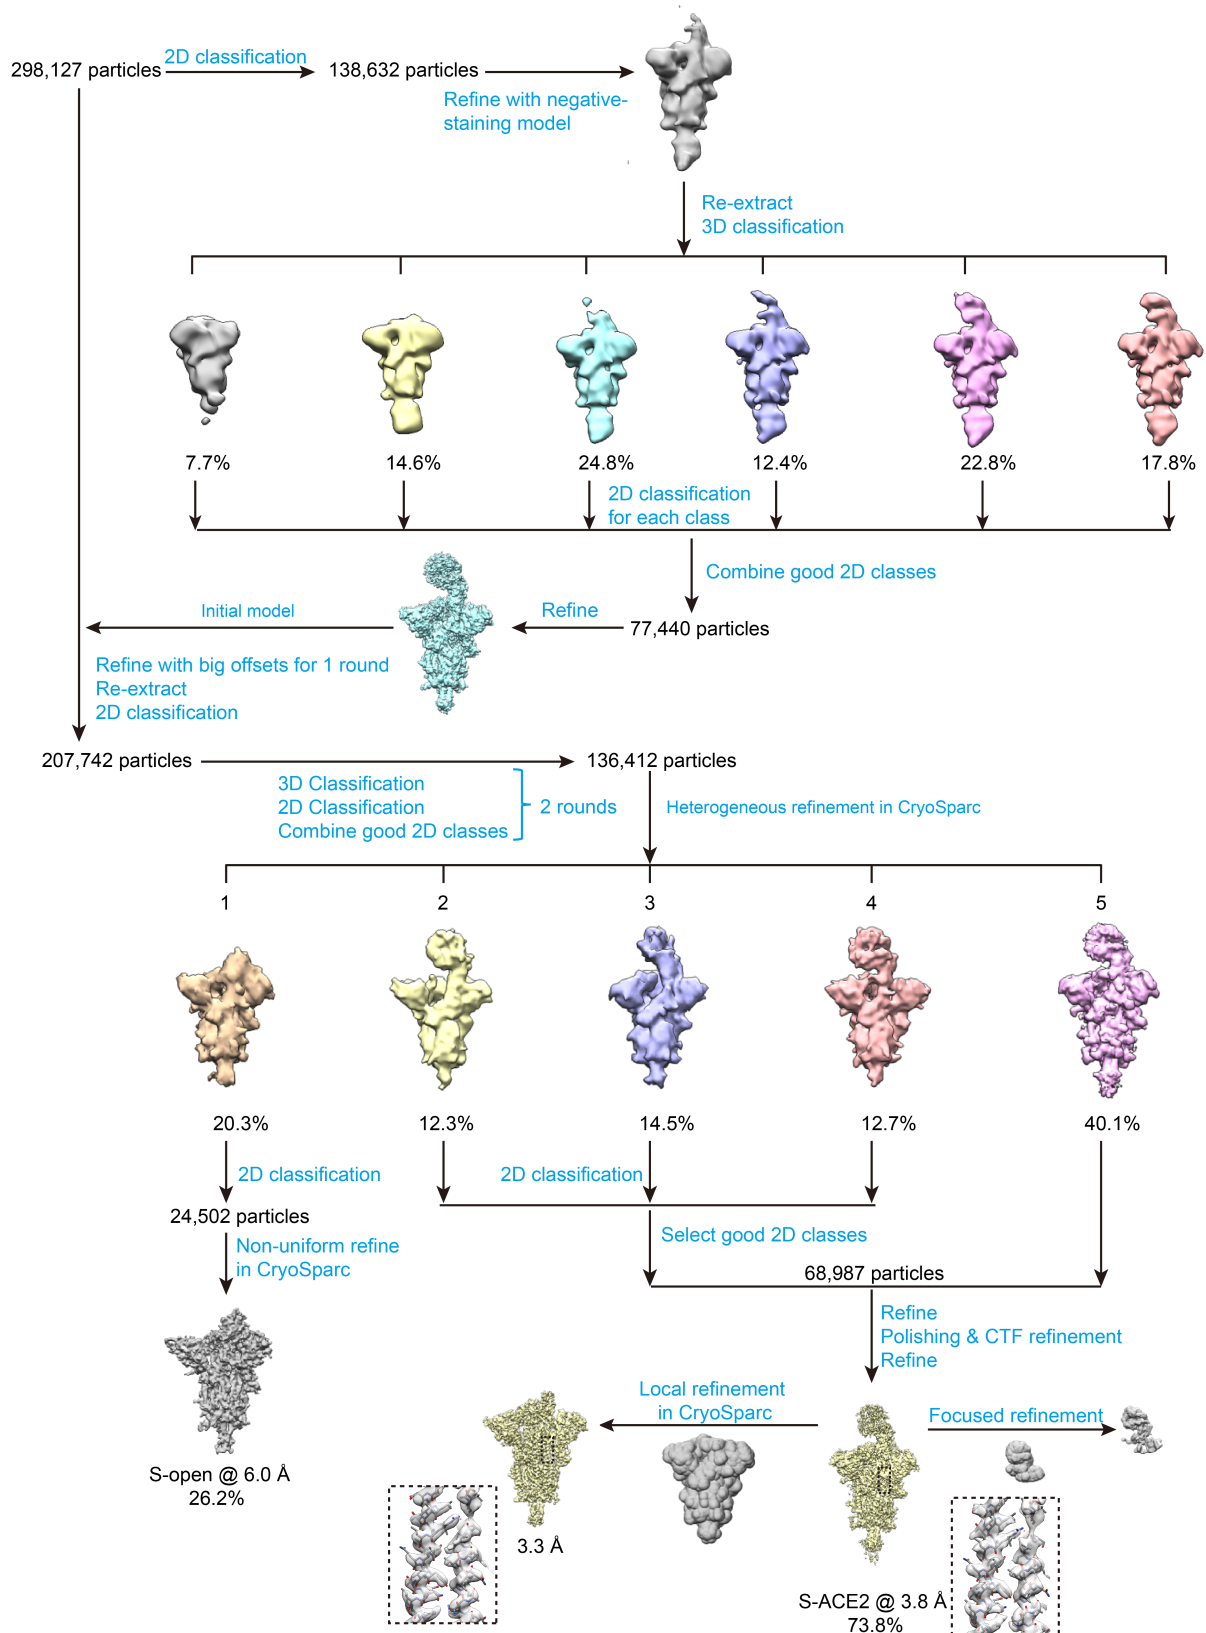

**Fig. S6. Cryo-EM data processing procedure for SARS-CoV-2 S trimer in the presence of ACE2.**

1 10 20 30 40 50  
 SARS-CoV-2 MFVFLVLPVLS...QCVNLTTRTQLPPAYTNSFTRGVYYPDKVFRSSVLIHSTODLFL  
 SARS-CoV MFIFFLFLTITSGSDDLDRCTTFDDVQAPNYTQHTSMTSGVYYPDEIFRSDTLYLTODLFL

60 70 80 90 100 110  
 SARS-CoV-2 PFFSNVTWFHATHVSGTNGTKRFDNPVLPFNDGVYFASTEKSNIIIRGNIFGTLLDSTKTS  
 SARS-CoV PFYSNVTGFHTLNHL...EIGNPVIPEKDGIFYFAATEKSNVVRGWVFGSTLNNKSSOS

120 130 140 150 160 170  
 SARS-CoV-2 LLIIVNNA TNVVIKVC EEF CNDPFLGVY YHKNNKSWMESEFRVYSANNTCTFEYV SQPFL  
 SARS-CoV VILINNS TNVVIKVC EEF CNDPFLGVY YHKNNKSWMESEFRVYSANNTCTFEYV SQPFL

180 190 200 210 220 230  
 SARS-CoV-2 MDLEGGKGNFKNLRFEVFKNIDGVFKIYSKH TPI NLRVDLPQGSALPFLVLDLPTGINIT  
 SARS-CoV LDVSEKSGNFKNLRFEVFKNIDGVFKIYSKH TPI NLRVDLPQGSALPFLVLDLPTGINIT

240 250 260 270 280 290  
 SARS-CoV-2 RFQTLTAIHRSYLTPGDS SSGWITAGAAAYVVGYLQPR TFL LKYN ENGTITDAVDCALDPL  
 SARS-CoV NFRALTAIHRSYLTPGDS SSGWITAGAAAYVVGYLQPR TFL LKYN ENGTITDAVDCALDPL

300 310 320 330 340 350  
 SARS-CoV-2 SETKCTLKSFTEVKGIYQTSNFRVQPTESLVRFPPNITNLCPPGEVFNATRFASVYAWNREK  
 SARS-CoV AELKCSVKSEFIDKGIYQTSNFRVQPTESLVRFPPNITNLCPPGEVFNATRFASVYAWNREK

360 370 380 390 400 410  
 SARS-CoV-2 RISNCVADYSVLYNSAS FSTFKCYGVSPTKLNDCI FSNVYADSFVIRGDEVRQIAPGQTC  
 SARS-CoV KISNCVADYSVLYNS T FSTFKCYGVSPTKLNDCI FSNVYADSFVIRGDEVRQIAPGQTC

420 430 440 450 460 470  
 SARS-CoV-2 KIADYNYKLPDDETCGVFAWNSNLDISKVCGNYNYRFLFRKSNLKPFERDISREIYQAG  
 SARS-CoV V IADYNYKLPDDETCGVFAWNSNLDISKVCGNYNYRFLFRKSNLKPFERDISREIYQAG

480 490 500 510 520 530  
 SARS-CoV-2 STPCN GVEGF NCFYPLQSYVGFQPTNCGVYQYRVRVLSFELIHPATVCGPKKSTNLVKN  
 SARS-CoV GKPCN GVEGF NCFYPLQSYVGFQPTNCGVYQYRVRVLSFELIHPATVCGPKKSTNLVKN

540 550 560 570 580 590  
 SARS-CoV-2 KCVNFNFNGLTGTGVLTF SNKKFLPFOQFGRDIADTDAVRDPTLEILDITPCSFGGVS  
 SARS-CoV QCVNFNFNGLTGTGVLTF SKRRFLPFOQFGRDVSDFDTSVRDEKTSLEILDITPCSFGGVS

600 610 620 630 640 650  
 SARS-CoV-2 VITPGTNTSNQVAVLYQDVNCTEVPVAIHADQLTPTWRVYSTGNNVFQTRAGCLIGAEHV  
 SARS-CoV VITPGTNTASQVAVLYQDVNCTEVPVAIHADQLTPTWRVYSTGNNVFQTRAGCLIGAEHV

660 670 680 690 700 710  
 SARS-CoV-2 NNSYECDIPIGAGICASYQTQNTNSPRRARSVA SQSITVAYTMSLGAENSVAYSNNLAIPPT  
 SARS-CoV DTSYECDIPIGAGICASYHTVSN...LRS TSQKSI VAYTMSLGAENSVAYSNNLAIPPT

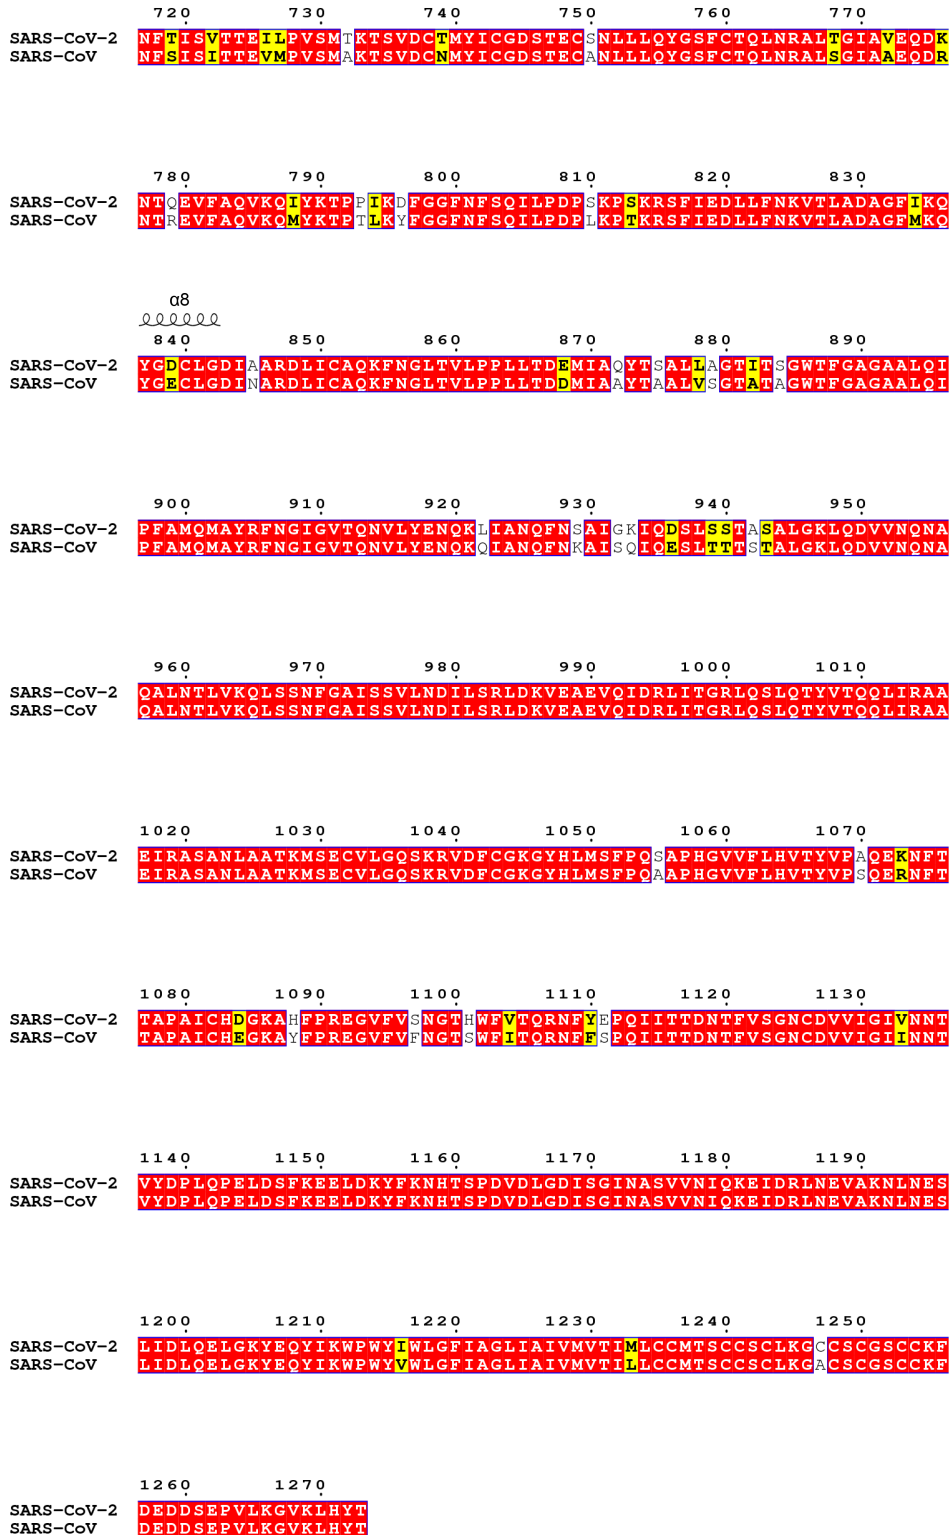

**Fig. S7. Amino acid sequence alignment of SARS-CoV-2 S with SARS-CoV S.** Sequence alignment was performed by ESPrnt (64). The RBD domain is labeled in green frames, and the subdomains of RBM as well as several other key structural elements are also labeled.



**Table S1 Cryo-EM data collection and refinement statistics.**

|                                                 | SARS-CoV-2 S                                 | SARS-CoV-2 S + ACE2<br>(with cross-linker) |         | SARS-CoV-2<br>S + ACE2<br>(w/o cross-<br>liker) |
|-------------------------------------------------|----------------------------------------------|--------------------------------------------|---------|-------------------------------------------------|
| <b>Data collection</b>                          |                                              |                                            |         |                                                 |
| EM equipment                                    | Titan Krios                                  | Titan Krios                                |         | Titan Krios                                     |
| Voltage (kV)                                    | 300                                          | 300                                        |         | 300                                             |
| Detector                                        | K2 Summit                                    | K2 Summit                                  |         | K2 Summit                                       |
| Pixel size (Å)                                  | 1.02                                         | 1.02                                       |         | 1.02                                            |
| Electron dose (e <sup>-</sup> /Å <sup>2</sup> ) | 50                                           | 50                                         |         | 50                                              |
| Exposure time (s)                               | 6.45                                         | 6.45                                       |         | 6.45                                            |
| Frames                                          | 43                                           | 43                                         |         | 43                                              |
| Defocus range (μm)                              | -1.0 to -2.4                                 | -1.0 to -2.4                               |         | -1.0 to -2.4                                    |
| <b>Reconstruction</b>                           |                                              |                                            |         |                                                 |
| Softwares                                       |                                              | Relion 3.1 & CryoSparc                     |         |                                                 |
| Structures                                      | S-closed                                     | S-ACE2                                     | S-open  | S-ACE2<br>(w/o linker)                          |
| Final particles                                 | 142,345                                      | 68,987                                     | 24,502  | 32,866                                          |
| Symmetry                                        | C3                                           | C1                                         | C1      | C1                                              |
| Final overall<br>resolution (Å)                 | 2.7                                          | 3.8                                        | 6.0     | 5.3                                             |
| <b>Atomic modeling</b>                          |                                              |                                            |         |                                                 |
| Softwares                                       | Swiss-model,<br>Modeller,<br>Phenix,<br>COOT | Phenix,<br>Rosetta, COOT                   | Rosetta |                                                 |
| Rms deviations                                  |                                              |                                            |         |                                                 |
| Bond length (Å)                                 | 0.0041                                       | 0.0035                                     | 0.0081  |                                                 |
| Bond Angle (°)                                  | 0.97                                         | 0.91                                       | 1.00    |                                                 |
| Ramachandran plot<br>statistics (%)             |                                              |                                            |         |                                                 |
| Ramachandran<br>favored                         | 94.56%                                       | 95.85%                                     | 96.62%  |                                                 |
| Ramachandran<br>allowed                         | 5.35%                                        | 4.10%                                      | 3.32%   |                                                 |
| Ramachandran<br>outliers                        | 0.09%                                        | 0.05%                                      | 0.06%   |                                                 |
| Molprobrity score                               | 2.07                                         | 1.78                                       | 1.04    |                                                 |
| Clash score                                     | 15.50                                        | 9.35                                       | 1.12    |                                                 |
| EMRinger score                                  | 3.05                                         | 1.16                                       |         |                                                 |

**Table S2 Fusion peptide D828-F855 region involved interactions**

| D828-F855 region (FP) |      | Other motifs |      |              | Interaction            | Distance(Å) |
|-----------------------|------|--------------|------|--------------|------------------------|-------------|
| Residue               | Atom | Residue      | Atom | Location     |                        |             |
| K835                  | N    | D614         | OD1  | SD2 (prot 1) | H-bond                 | 3.74        |
| Y837                  | N    | D614         | O    | SD2 (prot 1) | H-bond                 | 3.89        |
| Y837                  | OH   | P589         | O    | SD2 (prot 1) | H-bond                 | 3.56        |
| K854                  | NZ   | D614         | OD2  | SD2 (prot 1) | Salt bridge<br>/H-bond | 2.67        |
| K854                  | NZ   | D614         | OD1  | SD2 (prot 1) | Salt bridge            | 3.18        |
| Q836                  | OE1  | N616         | N    | SD2 (prot 1) | H-bond                 | 3.00        |
| Q853                  | NE2  | A956         | O    | HR1 (prot 3) | H-bond                 | 3.84        |
| Q853                  | NE2  | N960         | OD1  | HR1 (prot 3) | H-bond                 | 2.35        |

**Table S3 SARS-CoV-2 S-ACE2 structure revealed RBD-ACE2 interactions**

H-bonds at the RBD-ACE2 interface within the S-ACE2 complex

| RBD from SARS-CoV-2 S |      | ACE2    |      | Interaction | Distance(Å) |
|-----------------------|------|---------|------|-------------|-------------|
| Residue               | Atom | Residue | Atom |             |             |
| G446                  | O    | Q42     | NE2  | H-bond      | 3.49        |
| A475                  | O    | S19     | N    | H-bond      | 2.43        |
| N487                  | OD1  | Y83     | OH   | H-bond      | 2.26        |
| Y489                  | OH   | Y83     | OH   | H-bond      | 3.72        |
| S494                  | O    | H84     | NE2  | H-bond      | 2.42        |
| T500                  | OG1  | Y41     | OH   | H-bond      | 2.45        |
| G502                  | N    | K353    | O    | H-bond      | 2.44        |
| Y505                  | OH   | A386    | O    | H-bond      | 2.36        |
| Y505                  | OH   | R393    | NH2  | H-bond      | 2.43        |

Contacting residues at the SARS-CoV-2 RBD-ACE2 interface (distance cutoff of 4 Å)

| SARS-CoV-2 S RBD | ACE2                   |
|------------------|------------------------|
| Y453             | H34                    |
| L455             | K31                    |
| F456             | T27, D30, K31          |
| Y473             | T27                    |
| A475             | S19, T27               |
| G476             | S19, Q24               |
| F486             | L79, M82, Y83          |
| N487             | Q24, Y83               |
| Y489             | T27, F28, K31          |
| F490             | K31                    |
| Q493             | K31, H34               |
| S494             | H34                    |
| Y495             | H34                    |
| G496             | K353                   |
| Q498             | Y41                    |
| T500             | Y41, D355, R357        |
| N501             | K353                   |
| G502             | K353, G354             |
| Y505             | K353, G354, A386, R393 |
